# Supplementary material for: Clinical impact of diabetes mellitus on 2-year clinical outcomes following PCI with second-generation drug-eluting stents; Landmark analysis findings from patient registry: Pooled analysis of the Korean multicenter drug-eluting stent registry
Source: PubMed Central journal article supplement (PMC7286514; doi:10.1371/journal.pone.0234362), 2020-06-10
Supplement: pone.0234362.s003.pdf [file pone.0234362.s003.pdf]

| <b>Design</b>                           | <b>K-EVEREST</b>                                                                                                                                                                                                                                                                                                                                       | <b>CONSTANT</b>                                                                        |
|-----------------------------------------|--------------------------------------------------------------------------------------------------------------------------------------------------------------------------------------------------------------------------------------------------------------------------------------------------------------------------------------------------------|----------------------------------------------------------------------------------------|
| Study type                              | 21 Centers, prospective, nonrandomized observational registry including PCI with CoCr-EES                                                                                                                                                                                                                                                              | 7 Centers, prospective, nonrandomized observational registry including PCI with Re-ZES |
| Stent name                              | Xience V™                                                                                                                                                                                                                                                                                                                                              | Resolute-Integrity™                                                                    |
| Stent type used for PCI                 | Cobalt-chromium everolimus-eluting stents                                                                                                                                                                                                                                                                                                              | Zotarolimus-eluting stents                                                             |
| Main inclusion criteria                 | DS for epicardial coronary artery $\geq 70\%$ , or 50%–70% with objective evidence of myocardial ischemia; diameter stenosis for left main coronary artery $\geq 50\%$ , and amenable to PCI.                                                                                                                                                          |                                                                                        |
| Exclusion criteria                      | The exclusion criteria were minimal. Patients with cardiogenic shock, malignant disease, or other comorbid conditions with a life expectancy of <12 months; those treated with a mixture of different types of DES; and those with planned surgery necessitating interruption of antiplatelet drugs within 6 months after the procedure were excluded. |                                                                                        |
| Recruitment period                      | Feb 2009–Apr 2011                                                                                                                                                                                                                                                                                                                                      | Jul 2011–Dec 2013                                                                      |
| Follow-up period<br>(median and IQR), y | 2.03 (1.96–2.08)                                                                                                                                                                                                                                                                                                                                       | 2.02 (1.97–2.07)                                                                       |

Abbreviations: DES, drug-eluting stents; DS, diameter stenosis; CoCr-EES, cobalt-chromium everolimus-eluting stent(s); IQR, interquartile range; Re-ZES, Resolute zotarolimus-eluting stent(s).
