# Supplementary material for: Clinical impact of diabetes mellitus on 2-year clinical outcomes following PCI with second-generation drug-eluting stents; Landmark analysis findings from patient registry: Pooled analysis of the Korean multicenter drug-eluting stent registry
Source: PubMed Central journal article supplement (PMC7286514; doi:10.1371/journal.pone.0234362), 2020-06-10
Supplement: pone.0234362.s004.pdf [file pone.0234362.s004.pdf]

| <b>Characteristics</b>               | <b>Non-DM<br/>(n=1309.1)</b> | <b>DM<br/>(n=602.5)</b> | <b>SMD</b> |
|--------------------------------------|------------------------------|-------------------------|------------|
| Age (years)                          | 64.02 (11.14)                | 64.16 (10.08)           | 0.013      |
| Men                                  | 0.70 (0.46)                  | 0.70 (0.46)             | 0.002      |
| Body-mass index (kg/m <sup>2</sup> ) | 24.41 (3.15)                 | 24.41 (3.23)            | 0.001      |
| Hypertension                         | 0.55 (0.50)                  | 0.55 (0.50)             | 0.01       |
| Hyperlipidemia                       | 0.20 (0.40)                  | 0.20 (0.40)             | 0.012      |
| Current smoker                       | 0.35 (0.48)                  | 0.35 (0.48)             | 0.017      |
| Atrial fibrillation                  | 0.02 (0.15)                  | 0.02 (0.14)             | 0.014      |
| Previous MI                          | 0.02 (0.14)                  | 0.02 (0.15)             | 0.022      |
| Previous PCI                         | 0.09 (0.28)                  | 0.09 (0.29)             | 0.004      |
| Previous CABG                        | 0.01 (0.11)                  | 0.01 (0.11)             | 0.009      |
| Renal failure                        | 0.03 (0.18)                  | 0.03 (0.18)             | 0.002      |
| Cerebrovascular disease              | 0.08 (0.27)                  | 0.08 (0.27)             | 0.001      |
| Ejection fraction (%)                | 56.8 (10.7)                  | 56.94 (10.5)            | 0.011      |
| Clinical presentation                |                              |                         | 0.001      |
| Stable angina                        | 0.31 (0.46)                  | 0.31 (0.46)             |            |
| Unstable angina                      | 0.29 (0.45)                  | 0.29 (0.46)             |            |
| NSTEMI                               | 0.20 (0.40)                  | 0.20 (0.40)             |            |
| STEMI                                | 0.20 (0.40)                  | 0.20 (0.40)             |            |
| Discharge medications                |                              |                         |            |
| Aspirin                              | 0.99 (0.11)                  | 0.99 (0.12)             | 0.007      |
| ADP receptor antagonist              | 0.93 (0.26)                  | 0.93 (0.25)             | 0.018      |

|                         |             |             |       |
|-------------------------|-------------|-------------|-------|
| Cilostazol              | 0.19 (0.39) | 0.19 (0.39) | 0.002 |
| $\beta$ -blocker        | 0.75 (0.43) | 0.74 (0.44) | 0.01  |
| Calcium channel blocker | 0.18 (0.39) | 0.19 (0.39) | 0.008 |
| ACE inhibitor or ARB    | 0.66 (0.47) | 0.65 (0.48) | 0.01  |
| Statin                  | 0.81 (0.39) | 0.81 (0.40) | 0.009 |

---

Data are shown as mean (SD) for continuous variables and absolute numbers (percentage) for dichotomous variables. Abbreviations: CABG, coronary artery bypass grafting; CAD, coronary artery disease; CHF, congestive heart failure; NSTEMI, non-ST-elevation myocardial infarction; MI, myocardial infarction; PCI, percutaneous coronary intervention; STEMI, ST-elevation MI; SMD, standardization mean differences
